# Supplementary material
Source: Frontiers journal article supplement (https://www.frontiersin.org/articles/558257)
Supplement: Data_Sheet_1.PDF [file Data_Sheet_1.PDF]

**SUPPLEMENTARY TABLE 1** | Cloning strategy to obtain the infectious dimer plasmids of CoYVCUV, DesLDV (DNA-A and DNA-B) and DeLDD.

| DNA component | Monomer enzyme <sup>1</sup> | Dimer enzyme <sup>2</sup> | Binary vector enzymes <sup>3</sup> | Infectious dimer plasmid |
|---------------|-----------------------------|---------------------------|------------------------------------|--------------------------|
| CoYVCUV       | <i>SacI</i>                 | <i>EcoRI</i>              | <i>Spe/HindIII</i>                 | pC0380dimCoYVCUV         |
| DesLDV DNA-A  | <i>SacI</i>                 | <i>PstI</i>               | <i>Spe/HindIII</i>                 | pC0380dimDesLDV-A        |
| DesLDV DNA-B  | <i>SacI</i>                 | <i>EcoRI</i>              | <i>Spe/HindIII</i>                 | pC0380dimDesLDV-B        |
| DesLDD        | <i>HindIII</i>              | <i>HindIII</i>            | <i>EcoRI/SalI</i>                  | pC0380dimDesLDD          |

<sup>1</sup>Enzyme used to clone the virus or satellite monomers in the vectors *pGEM-T Easy* or *pBluescriptII SK(+)*.

<sup>2</sup>Enzyme used to clone the virus or satellite dimers in the vector *pBluescriptII SK(+)*.

<sup>3</sup>Enzymes used to clone the virus or satellite dimers in the binary vector *pCAMBIA0380*.

**SUPPLEMENTARY TABLE 2** | List of primers designed to amplify by PCR the DNA fragments of each begomovirus and deltasatellite genomic component to prepare the probes used in this study.

| Probe        | Primer name | Primer sequence (5'- 3')  |
|--------------|-------------|---------------------------|
| CoYVCUV      | MA2807 (FW) | CTCTTGCAATTTCTTCCGGGACG   |
|              | MA2808 (RV) | GGAAAGTTCAAATGCCAGAATAAC  |
| DesLDV DNA-A | MA2805 (FW) | GTCCGGCACGTTAGTGAAAGAG    |
|              | MA2806 (RV) | GAAGCTCTTCAGATGCTTCAAAAC  |
| DesLDV DNA-B | MA2550 (FW) | CGAGCCCAAGTTGACAAGCCAAACC |
|              | MA2551 (RV) | GGATGCTTTAGACATGGTATCGGAC |
| DesLDD       | MA2554 (FW) | GTCCGTGTCACTTCTTTATCTCCGC |
|              | MA2555 (RV) | CTTAGCTACGGCGGAGCTAAGGCTG |

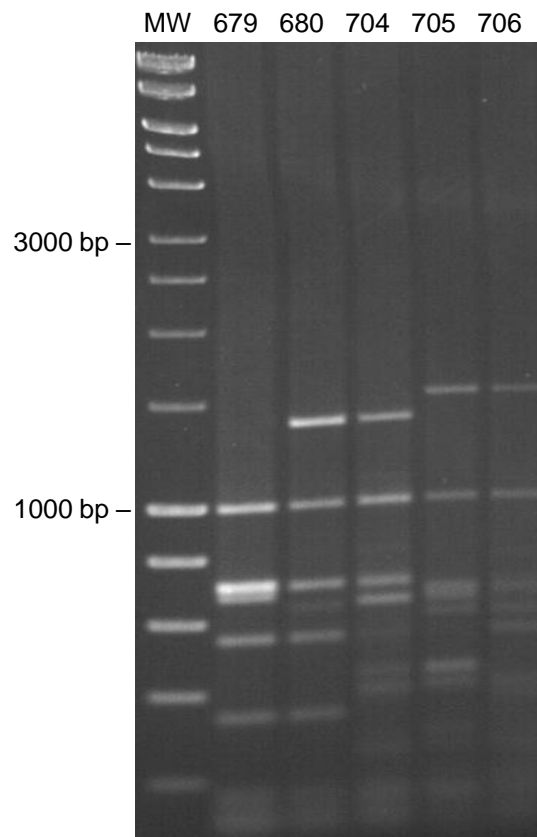

**SUPPLEMENTARY FIGURE 1.** Restriction fragment length polymorphism (RFLP) analysis performed by digestion of rolling circle amplification (RCA) products obtained from *Corchorus siliquosus* plant DNA extracts (samples 679, 680, 704, 705 and 706) with the restriction enzyme *Hpa*II revealed on a 1.5% agarose gel. MW: molecular weight marker (HyperLadder 1kb, Bionline).

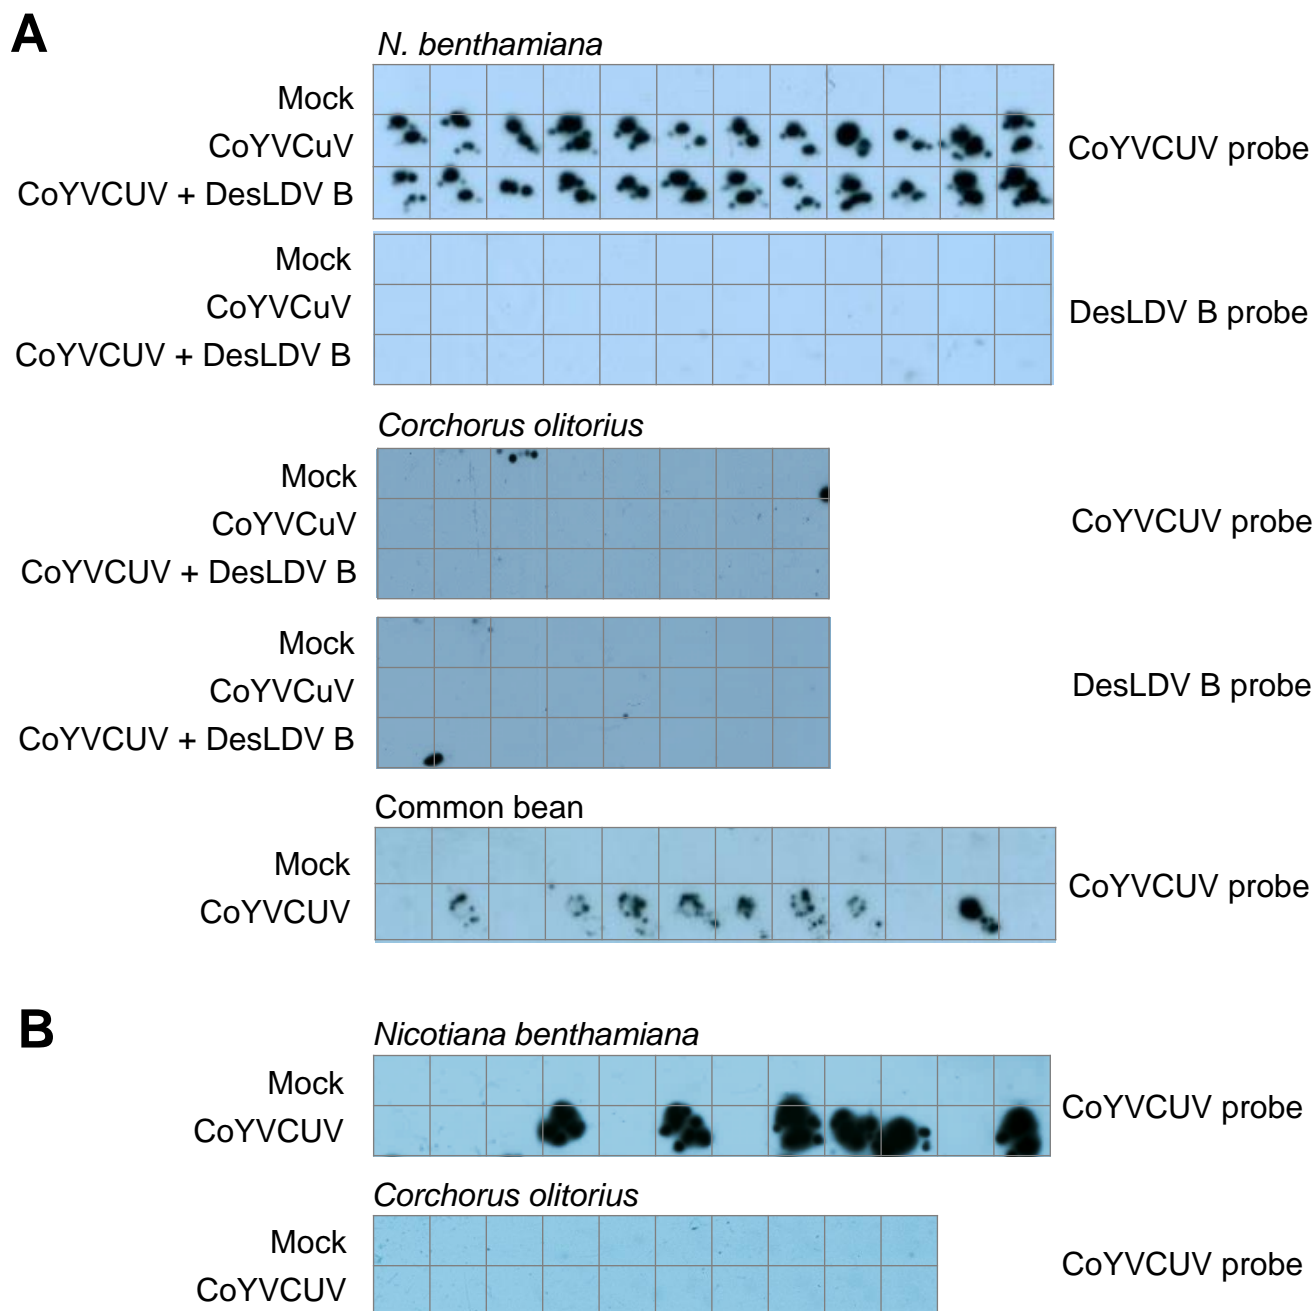

**SUPPLEMENTARY FIGURE 2.** Inoculation experiments with Corchorus yellow vein Cuba virus (CoYVCUV) DNA-A (alone or in combination with DesLDV DNA-B). CoYVCUV DNA-A and DesLDV DNA-B specific digoxigenin-labelled DNA probes were used to analyze agroinoculated *Nicotiana benthamiana*, *Corchorus olitorius* and common bean plants **(A)** or biolistically inoculated *N. benthamiana* and *C. olitorius* plants **(B)** after tissue printing on nylon membranes. Tissue prints of mock-inoculated plants were included as negative controls. Results correspond to Expt. 2 in Table 4.

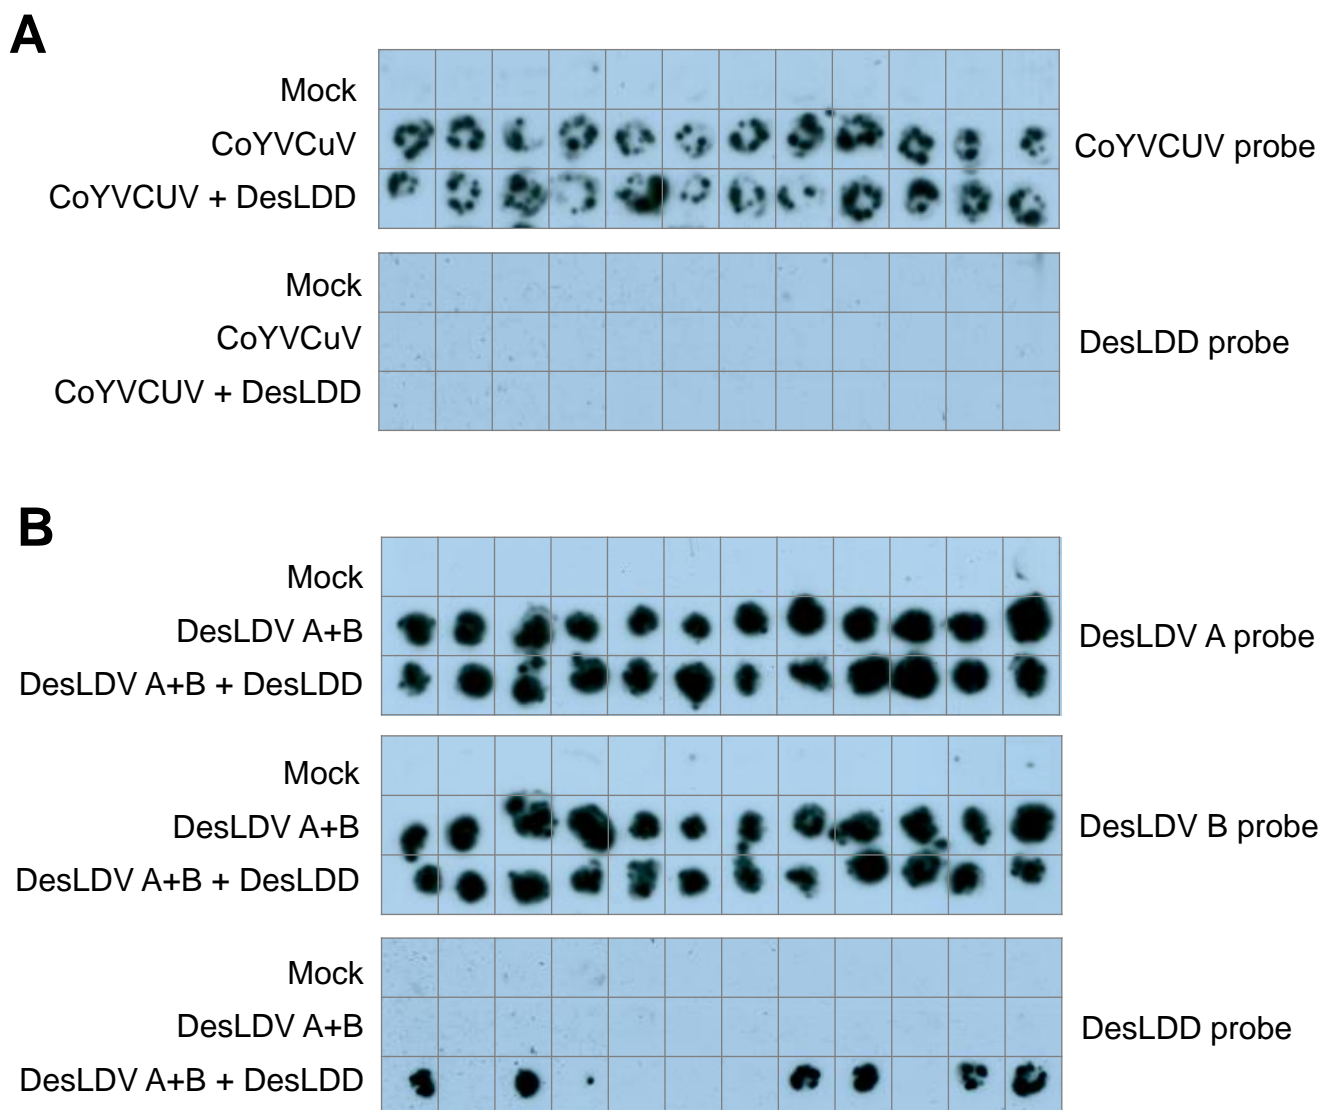

**SUPPLEMENTARY FIGURE 3.** Agroinoculation experiments with Desmodium leaf distortion deltasatellite (DesLDD) in the presence of Corchorus yellow vein Cuba virus (CoYVCUV) DNA-A (**A**) or Desmodium leaf distortion virus (DesLDV) DNA-A and DNA-B (**B**). CoYVCUV DNA-A, DesLDV DNA-A, DesLDV DNA-B and DesLDD specific digoxigenin-labelled DNA probes were used to analyze agroinoculated *Nicotiana benthamiana* plants after tissue printing on nylon membranes. Tissue prints of mock-inoculated plants were included as negative controls. Results correspond to Expt. 2 in Table 5.
